# Supplementary material
Source: Springer Nature journal article supplement (https://www.springermedizin.de/resource/supplementary/13054_2009_8419_MOESM1_ESM.pdf/9731926)

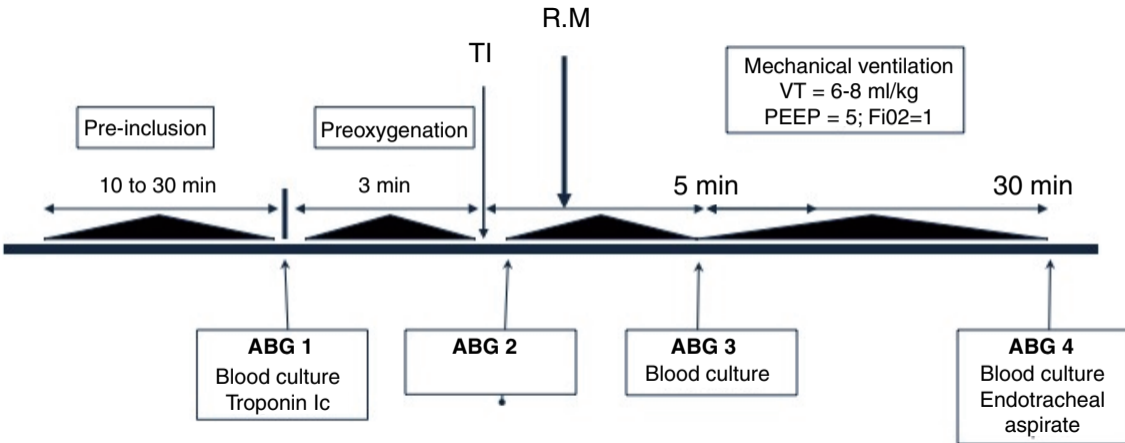

Supplement: MOESM1 [file 9731926]
